# Supplementary material for: Immune normalization strategy against suboptimal health status: safe and efficacious therapy using mixed-natural killer cells
Source: Aging (Albany NY). 2021 Aug 30;13(16):20131–48. doi: 10.18632/aging.203279 (PMC8436936; doi:10.18632/aging.203279)
Supplement: Supplementary Table 1 [file aging-13-203279-s002.xlsx]

## Sheet: Sheet1
Supplementary Table 1. NKM cytotoxicity and its correlations with the subpopulation of NKM.
Samples	Cytotoxicity（E/T=10:1,2h)	Cytotoxicity（E/T=10:1,4h)	NK Ratio （CD16+56+）	NKT Ratio （CD3+16+56+）	CD3 Ratio	CD4 Ratio	CD8 Ratio	CD4+PD-1+ /CD4+	CD8+PD-1+ /CD8+	CD3+PD-1+ /PBMC	CD56+CD16- Ratio	CD56+CD16+ Ratio	CD56-CD16+ Ratio
Donor-NKM-1	105	111	22.12	19.27	75.51	25.91	52.92	11.65	5.88	5.53
Donor-NKM-2	105	106	55.42	23.34	40.99	18.36	25	10.76	6.24	2.97
Donor-NKM-3	105	105	16.26	22.1	81.03	22.05	59.38	8.89	4.08	4.54
Donor-NKM-4	104	106	32.35	16.1	62.6	40.48	21.72
Donor-NKM-5	104	108	4.99	31.53	94.12	31.89	72.5	6.76	3.11	3.29
Donor-NKM-6	103	110	19.55	11.43	78.91	51.9	29.65	4.22	6.11	3.83	7.04	15.06	1.09
Donor-NKM-7	99	102	21.73	30.81	76.6	48.05	35.53	3.66	2.36	2.35
Donor-NKM-8	99	102	18.9	40.29	76.9	56.08	23.66	5.59	6.86	4.98
Donor-NKM-9	99	104	17.37	30.38	77.91	28.56	66.39	8.97	4.93	4.69
Donor-NKM-10	99	108	5.52	67.91	88.16	44.51	68.56	4.51	3.11	3.09
Donor-NKM-11	99	105	16.92	35.52	76.22	14.2	82.23	8.03	5.68	6.23
Donor-NKM-12	98	103	16.43	43.87	78.71	35.86	42.87	11.49	4.41	9.23
Donor-NKM-13	98	101	25.55	23.73	70.17	12.15	51.8
Donor-NKM-14	97	100	19.23	22.52	76.78	31.55	47.55	6.59	3.22	3.22
Donor-NKM-15	97	102	25.59	8.7	71.81	37	34.89	5.45	3.41	2.94	16.74	12.33	0.64
Donor-NKM-16	96	98	33.04	21.79	63.08	25.48	40.49	9.15	5.33	3.69
Donor-NKM-17	96	99	10.63	21.08	84.27	20.66	60.68
Donor-NKM-18	95	97	26.35	52.55	67.63	33.19	66.56	3.91	2.69	1.91
Donor-NKM-19	95	101	38.9	13.75	59.73	34.04	22.09	4.82	3.35	2.45
Donor-NKM-20	95	101	9.77	22.03	88.14	33.7	51.99	2.49	1.95	1.9	13.79	7.45	1.83
Donor-NKM-21	95	101	18.96	29.25	79.1	23.6	59.1	7.75	7.57	6.36
Donor-NKM-22	95	100	4.99	8.48	92.69	68.59	27.4	1.25	1.95	1.23	1.9	4.94	1.96
Donor-NKM-23	94	101	7.83	10.48	88.92	33.77	58.18	7.11	3.76	4.69
Donor-NKM-24	94	100	25.72	7.65	69.24	34.48	35.28	2.05	1.36	1.07
Donor-NKM-25	94	96	19.44	26.48	77.34	34	41.5	4.23	1.33	1.76
Donor-NKM-26	93	100	12.84	14.69	85.29	22.37	68.28	2.71	1.56	1.91	2.46	14.21	9.98
Donor-NKM-27	93	97	60.8	28.18	37.14	15.28	32.51	8.3	6.58	1.96
Donor-NKM-28	93	98	47.05	33.74	49.67	12.97	53.04	9.69	3.8	3.15
Donor-NKM-29	93	96	21.84	17.97	75.32	27.82	52.24	12.91	9.01	7.44	4.93	24.01	4.05
Donor-NKM-30	93	99	24.53	18.98	71.33	36.8	41.28	7.36	6.19	5.1	7.23	23.2	4.7
Donor-NKM-31	93	98	24.6	17.69	66.56	31.53	33.62	6.59	4.34	3.68
Donor-NKM-32	92	98		18.71	74.86	16.59	35.54	9.25	4.62	4.21
Donor-NKM-33	92	96	15.36	14.04	83.22	21.62	62.31	8.07	3.73	4.01	10.29	12.4	0.81
Donor-NKM-34	92	100	11.81	24.53	85.63	33	44.98	2.88	1.34	1.57
Donor-NKM-35	91	92	27.23	8.56	66.95	30.48	35.97	3.11	2.27	1.47
Donor-NKM-36	91	93	21.5	30.13	75.67	10.67	57.8	4.77	2.75	2.92
Donor-NKM-37	91	95	39.1	7.15	55.38	26.79	27.81
Donor-NKM-38	91	103	8.75	14.32	88.72	29.46	59.33	3.37	1.73	2.07	5.09	8	1.01
Donor-NKM-39	91	102	55.18	16.84	42.41	12.78	27.52	3.35	1.63	1.02
Donor-NKM-40	90	91	20.19	14.74	77.88	23.73	43.57	14.67	5.85	5.2
Donor-NKM-41	90	94	25.07	16.18	72.67	16.35	58.53
Donor-NKM-42	90	94	42.31	13.83	56.28	32.03	23.93	5.36	3.99	2.63
Donor-NKM-43	90	98	11.51	30.81	86.21	26.71	79.06	7.94	5.6	5.85
Donor-NKM-44	89	101	13.38	13.41	75.41	44.55	50.98	10.45	8.84	7.85
Donor-NKM-45	89	95	13.62	26.13	84.86	24.95	64.2	3.67	1.58	1.97
Donor-NKM-46	88	102	28.61	29.46	66.05	8.71	45.16	14.16	5.45	5.47
Donor-NKM-47	88	90	33.9	13.18	63.02	30.73	29.38	4.27	3.41	2.23
Donor-NKM-48	87	102	6.96	25.34	91.66	22.58	75.89	4.7	1.6	1.52
Donor-NKM-49	87	96	22.86	34.02	73.97	31.44	46.85	1.99	5.29	2.39
Donor-NKM-50	87	99	10.13	19.45	78.6	22.02	62.19	6.01	3.01	2.94	4.43	11.91	12.94
Donor-NKM-51	87	98	4.69	16.23	93.63	38.97	54.63	4.78	2.91	3.51
Donor-NKM-52	86	88	20.31	26.31	76.14	14.36	64.76	12.06	0.51	0.61
Donor-NKM-53	86	96	12.49	18.68	84.12	2.82	68.84	17.32	4.78	3.91
Donor-NKM-54	86	91	23.97	23.7	73.74	18.71	59.25	5.3	1.57	1.54
Donor-NKM-55	86	93	7.65	18.94	89.91	52.88	41.73	3.76	2.57	3.31	7.88	8.71	3.27
Donor-NKM-56	85	85	31.42	18.17	65.28	41.26	27.55	3.13	1.01	1.74
Donor-NKM-57	85	98	6.83	10.82	91.04	34.88	64.18	3.18	1.85	2
Donor-NKM-58	85	93	12.15	9.01	85.14	17.03	56.35	8.03	7.69	6.38	4.55	10.73	2.48
Donor-NKM-59	85	95	13.62	22.21	81.8	27.11	60.2	3.86	0.96	1.71	3.39	11.65	2.55
Donor-NKM-60	84	91	14.81	24.13	85.7	50.46	38.2	9.38	5.22	6.3
Donor-NKM-61	83	91	13.07	18.71	85.29	27.27	52.58	2.3	1.48	1.57	13.8	10.13	1.66
Donor-NKM-62	83	99	6.44	16.34	91.5	26.25	65.07	4.8	2.38	2.5
Donor-NKM-63	83	96	5.12	14.25	92.38	74.55	26.06	0.84	1.44	0.93	2.62	4.44	1.92
Donor-NKM-64	82	94	13.49	16.63	83.03	21.07	65.85	3.52	2.66	2.57
Donor-NKM-65	82	91	25	41.12	72.95	12.67	62.42	16.02	9.51	8.64
Donor-NKM-66	80	92	6.07	34.77	91.87	16.72	77.06	8.7	4.1	5.26
Donor-NKM-67	80	94	6.04	34.74	88.95	32.15	50.53	3.69	2.65	3.45	9.27	16.01	9.55
Donor-NKM-68	80	91	7.05	15.26	90.99	44.4	56.35	9.1	6.33	6	4.41	9.47	2.95
Donor-NKM-69	80	93	4.73	33.51	93.88	13.92	71.29	10.69	4.52	3.51
Donor-NKM-70	79	94	9.3	17.66	88.99	15.34	64.89	5.93	3.56	3.4	9.76	11.32	3.19
Donor-NKM-71	78	89	22.48	46.5	74.21	11.7	45.7	13.01	6.66	3.91
Donor-NKM-72	78	87	19.28	42.86	78.44	15.24	60.74	5.99	3.13	2.61
Donor-NKM-73	78	91	8.3	21.23	81.87	46.09	36.99	11.86	4.64	6.62
Donor-NKM-74	77	86	6.39	14.32	90.63	19.27	75.92
Donor-NKM-75	77	99	16.14	37.44	79.79	33.23	52.72	4.36	2.56	2.4
Donor-NKM-76	76	96	24.27	31.36	72.3	42.63	31.16	4.22	2.41	2.25	4	23.25	4.59
Donor-NKM-77	75	90	5.08	29.24	89.6	22.94	46.89	2.25	1.31	1.12
Donor-NKM-78	75	90	16.53	19.2	78.34	33.68	43.41	6.26	2.89	3.16
Donor-NKM-79	74	92	6.47	12.34	89.84	33.23	59.59	5.92	3.77	4.12
Donor-NKM-80	74	98	6.81	24.97	87.76	28.09	58.89	5.01	2.26	2.89
Donor-NKM-81	74	95	13.85	23.44	82.83	11.61	67.24	4.57	5	4.1	2.97	13.87	2.21
Donor-NKM-82	74	86	8.31	20.02	88.9	14.38	71.42	4.9	1.89	2.56
Donor-NKM-83	74	91	3.5	43.83	92.79	22.92	48.95	2.37	5.96	2.39
Donor-NKM-84	74	86	7.33	18.55	86.38	19.83	67.63	6.19	2.75	2.53	5.58	10.39	14.53
Donor-NKM-85	73	89	15.08	12.13	76.91	47.57	32.93	8.57	6.18	7.21
Donor-NKM-86	73	93	4.43	53.06	90.46	19.66	80.5	4.78	4.36	4.12
Donor-NKM-87	73	86	17.45	38.14	81	21.02	51.94	13.99	5.84	3.94
Donor-NKM-88	73	90	3.7	15.45	93.74	33.59	61.15	1.82	0.77	1.11
Donor-NKM-89	72	88	39.97	16.95	55.56	19.81	32.59	8.4	1.6	3.39	9.03	35.27	3.27
Donor-NKM-90	71	93	13.39	27.41	77.11	24.55	39.92	7.52	3.5	3.2
Donor-NKM-91	71	88	6.14	37.61	91.12	44.33	50.21	3.18	2.3	2.84
Donor-NKM-92	71	87	6.9	29.24	91.86	34.6	62.78	5.07	1.66	2.72
Donor-NKM-93	71	100	8.06	21.15	86.56	32.14	53.7	5.36	2.16	2.81	4.85	6.26	0.81
Donor-NKM-94	69	82	28.92	18.06	53.57	19.74	46.47	4.81	3.12	3.28
Donor-NKM-95	69	87	6.46	6.38	84.07	38.07	66.62	6.44	6	5.89
Donor-NKM-96	69	84	14.45	14.02	79.56	17.53	67.09
Donor-NKM-97	69	86	2.18	38.9	92.51	50.26	51.99	3.65	2.96	2.85	26.02	3.27	1.42
Donor-NKM-98	68	87	8	21.64	86.48	56.21	30.92	4.7	2.88	3.73	2.45	6.78	2.57
Donor-NKM-99	68	77	11.17	21.3	78.6	20.76	56.32	5.09	1.68	1.96	4.21	13.83	10.86
Donor-NKM-100	68	89	11.44	27.41	82.56	15.42	66.57	5.54	3.79	3.74	14.33	2.69	1.09
Donor-NKM-101	67	82	10.51	30.07	84.66	27.59	57.6	10.89	4.87	4.51
Donor-NKM-102	66	82	8.43	66.78	88.1	50.11	42.22	7.57	6.07	5.92
Donor-NKM-103	66	84	9.95	74.3	88.43	47.78	74.13	5.16	5.28	4.52
Donor-NKM-104	66	84	4.99	34.68	86.38	44.08	44	4.2	2.89	2.7
Donor-NKM-105	65	79	8.55	25.09	87.31	32.38	59.48	5.84	2.31	2.55
Donor-NKM-106	65	83	13.69	30.84	82.89	22.57	47.07	3.33	2.47	2.31
Donor-NKM-107	64	85	3.88	23.37	92.3	46.48	55.96	2.51	2.23	2.18
Donor-NKM-108	63	89	7.3	34.94	89.82	14.61	79.1	9.01	5.53	5.15
Donor-NKM-109	63	79	7.21	22.3	87.87	46.43	38.27	3.03	2.41	2.14
Donor-NKM-110	63	81	2.31	32.23	94.8	43.46	64.12	5.28	3.39	3.58
Donor-NKM-111	62	80	28.41	28.57	69.48	24.21	48.65	6.77	3.7	2.76
Donor-NKM-112	62	78	3.03	60.79	92.16	49.31	49.73	5.93	3.4	4.26
Donor-NKM-113	61	79	9.7	28.16	87.17	22.96	66.57	6.46	2.99	2.48
Donor-NKM-114	61	77	16.12	41.87	82.27	19.78	54.96	8.71	4.76	4.11
Donor-NKM-115	60	74	5.89	15.89	90.45	29.35	51.82	7.05	5.46	6.01
Donor-NKM-116	60	69	7.33	18.56	88.48	25.97	45.05	6.78	3.96	3.47	2.25	6.3	9.24
Donor-NKM-117	59	73	5.97	21.77	88.56	40.01	50.33	2.91	1.86	1.76
Donor-NKM-118	59	80	6.73	16.69	91.92	34.94	57.07	3.97	1.37	2.18
Donor-NKM-119	59	73	24.64	14.56	66.84	33.48	32.68	4.56	3.26	2.91
Donor-NKM-120	59	70	12.04	16.47	81.91	45.31	36.01	6.77	2.28	3.78	3.02	10.59	4.45
Donor-NKM-121	59	87	10.49	31.02	86.01	12.08	17.39	6.22	4.34	2.78
Donor-NKM-122	59	87	5.55	35.33	93.04	16.33	61.04	3.18	1.59	1.63	10.53	6.44	1.22
Donor-NKM-123	58	71	13.55	29.5	82.6	18.16	49.38	3	1.39	1.8
Donor-NKM-124	57	75	15.34	22.71	79.88	11.53	67.95	7.06	6.41	4.75
Donor-NKM-125	57	74	3.79	39.56	93.54	24.02	46.95	1.47	4.55	2.62
Donor-NKM-126	56	91	14.02	36.44	75.93	11.56	68.92	5.4	6.37	4.21
Donor-NKM-127	56	73	37.2	7.36	54.29	27.68	27.96
Donor-NKM-128	56	74	4.75	11.33	91.78	74.49	29.11	1.28	2.07	1.33	2.34	4.33	2.26
Donor-NKM-129	56	74	6.26	27.01	90.68	40.31	37.16	3.97	3.43	3.36
Donor-NKM-130	56	72	7.43	23.76	88.57	44.99	35.06	6.23	2.15	3.38
Donor-NKM-131	55	74	4.15	24.12	94.91	21.97	68.44	5.3	2.68	3.1	17.67	2.32	0.71
Donor-NKM-132	55	78	4.51	47.03	87.97	44.21	47.81	3.13	1.82	1.88
Donor-NKM-133	54	67	3.93	53.41	90.56	29.25	22.36	5.33	3.23	2.26
Donor-NKM-134	54	73	5.53	19.01	85.87	40.15	43.64	10.43	7.86	6.24
Donor-NKM-135	53	71	5.98	45.06	89.98	29.4	60.78	7.54	5.79	7.64
Donor-NKM-136	52	69	4.97	45.59	90.24	27.76	59.92	11.97	10.9	10.28
Donor-NKM-137	52	69	6.34	18.86	90.1	47.11	40.12	5.05	4.5	3.25
Donor-NKM-138	51	71	1.77	44.9	95.33	17.48	79.06	3.82	1.42	1.43
Donor-NKM-139	51	64	0.95	40	96.02	32.06	71.8	2.77	1.59	1.5
Donor-NKM-140	51	62	35.36	17.86	59.16	23.73	36.26	3.06	7.53	3.81
Donor-NKM-141	50	64	4.38	12.47	93.08	8.16	62.13	6.17	4.66	4.04	5.77	4.26	2.53
Donor-NKM-142	50	70	3.18	23.32	93.22	56.57	42.95	2.59	2.23	2.03
Donor-NKM-143	50	67	4.84	21.7	93.4	30.47	57.75	3.48	1.44	1.71
Donor-NKM-144	49	61	2.09	10.73	96.17	57.01	41.09	3.73	5.07	5.43
Donor-NKM-145	48	69	3.86	14.52	91.46	43.35	38.64	5.31	4.06	3.74	6.97	3.32	1.39
Donor-NKM-146	48	68	13.18	10.35	78.79	63.24	17.82	3.63	3.55	3.11
Donor-NKM-147	47	63	7.58	35.91	88.89	14.53	50.87	4.46	1.93	1.98
Donor-NKM-148	46	61	4.42	27.26	91.96	30.87	58.48	5.02	2.56	2.82
Donor-NKM-149	46	57	0.59	26.38	99.06	15.89	84.81	4.32	1.36	1.7	14.49	0.77	0.23
Donor-NKM-150	45	65	5.79	65.19	92.09	23.54	87.55	5.29	2.25	2.12
Donor-NKM-151	45	57	13.79	38.02	84.55	19.37	51.67	11.44	4.41	3.5
Donor-NKM-152	45	66	14.22	44.1	83.66	9.55	52.77	7.54	2.19	4.18	25.24	12.08	4.09
Donor-NKM-153	44	63	4.63	61.8	90.85	19.72	75.36	11.87	10.02	9.31
Donor-NKM-154	44	66	13.18	27.17	83.88	20.53	63.82	5.2	2.47	2.67
Donor-NKM-155	44	58	19.45	23.43	73.23	45.24	24.71	4.99	2.9	3.25
Donor-NKM-156	44	59	6.57	36.15	89.11	33.44	47.76	6.26	3.82	4.25
Donor-NKM-157	43	49	4.84	16.26	92.46	31.39	64.09	7.11	3.84	3.12
Donor-NKM-158	43	61	4.25	8.03	93.63	61.15	33.12	2.68	2.36	2.29	1.59	4.25	3.49
Donor-NKM-159	42	44	0.53	14.41	96.79	45.69	59.17	2.08	3	2.82
Donor-NKM-160	42	61	3.35	31.53	93.95	44.45	62.25	2.5	2.39	2.12
Donor-NKM-161	42	57	2.46	19.67	86.65	32.66	52.33	3.92	1.57	1.68
Donor-NKM-162	42	52	4.71	17.37	90.74	50.45	38.36	2.23	2.24	1.95	1.08	5.11	2.78
Donor-NKM-163	40	41	3.87	9.72	90.54	43.48	54.01	3.68	3.03	3.38
Donor-NKM-164	40	54	4.92	80.9	93.49	14.75	34.02	9.56	10.24	3.15
Donor-NKM-165	40	47	4.94	14.03	91.93	21.83	57.41	3.96	1.89	1.33
Donor-NKM-166	40	52	4.38	12.16	88.48	37.48	43.48	7.18	4.17	3.98	3.45	3.83	5.49
Donor-NKM-167	39	56	0.85	74.27	95.56	30.98	78.43	6.11	2.24	2.55
Donor-NKM-168	39	68	20.21	12.52	66.83	33.11	29.49	8.06	6.63	5.12	13.97	4.45	2.96
Donor-NKM-169	39	51	3.73	46.53	94.78	29.47	64.78	8.63	2.11	3.22
Donor-NKM-170	38	51	8.5	57.06	73.51	24.49	75.31	12.71	8.07	6.97
Donor-NKM-171	38	54	8.09	23.35	88.12	44.54	42.34	4.55	2.04	2.86
Donor-NKM-172	38	48	5.92	11.47	88.7	52.88	34.3	5.03	3.56	7.48
Donor-NKM-173	35	51	1.47	10.91	92.84	68.07	25.84	1.11	1.9	1.3	1.08	1.74	2.17
Donor-NKM-174	34	50	6.46	6.38	84.07	38.07	66.62	6.44	6	5.89
Donor-NKM-175	34	54	4.25	24.9	89.49	51.53	33	5.73	3.9	3.59
Donor-NKM-176	33	45	4.11	42.25	91.06	27.83	73.62	4.98	2.63	2.34
Donor-NKM-177	33	46	1.78	25.74	93.03	41.45	70.18	6.09	5.38	4.28
Donor-NKM-178	32	46	1.68	20.98	95.23	20.59	76.85	3.99	1.29	1.87
Donor-NKM-179	29	41	2.71	24.58	94.52	27.1	86.84	6.94	3.38	3.52
Donor-NKM-180	29	43	4.43	17.52	88.85	32.32	58.98	4.26	4.31	3.91
Donor-NKM-181	29	39	1.54	9.91	96.21	47.89	58.16	5.23	3.48	3.39
Donor-NKM-182	29	39	2.31	22.4	92.92	59.76	65.81	5.01	4.72	3.71
Donor-NKM-183	29	38	1.98	25.4	89.2	49.39	37.53	1.75	1.07	1.29
Donor-NKM-184	27	39	1.18	6.14	95.29	69.32	27.36	1.4	2.25	1.33	0.82	1.44	4.38
Donor-NKM-185	26	35	0.25	11.48	95.82	43.74	62.14	3.82	2.32	2.4
Donor-NKM-186	25	34	1.2	6.36	94.98	38.3	61.47	7.02	3.69	4.47	1.8	1.44	1.39
Donor-NKM-187	25	30	1	13	97.77	58.71	41.65	2.54	3.19	3.38
Donor-NKM-188	24	36	4.43	17.52	91.45	38.5	44.16	3.67	2.89	2.26
Donor-NKM-189	23	28	7.43	23.76	96.76	64.79	33.78	3.62	2.28	2.5
Donor-NKM-190	22	27	1.53	39.71	94.28	41.13	60.65	6.67	3.81	3.95
Donor-NKM-191	22	29	0.93	15.08	96.66	31.61	75.95	3.38	1.81	1.75
Donor-NKM-192	22	34	0.76	10.59	97.41	34.75	66.95	2.01	1.4	1.36
Donor-NKM-193	21	26	0.45	38.08	93.61	38.25	60.73	6.61	2.86	2.83
Donor-NKM-194	20	23	0.82	12.51	95.16	44.98	56.26	2.71	2.06	2.02
Donor-NKM-195	18	21	6.82	13.34	84.49	38.44	49.1	8.05	6.41	8.23
Donor-NKM-196	18	27	2.25	12.74	91.88	69.85	26.46	2.11	2.1	1.74
Donor-NKM-197	16	20	0.34	8.76	97.07	56.83	45.52	4.95	1.42	3.02	4.46	0.69	0.33
Donor-NKM-198	15	8	0.09	7.76	98.3	82.37	20.74	4.07	7.22	4.18
