# Supplementary material for: Immune normalization strategy against suboptimal health status: safe and efficacious therapy using mixed-natural killer cells
Source: Aging (Albany NY). 2021 Aug 30;13(16):20131–48. doi: 10.18632/aging.203279 (PMC8436936; doi:10.18632/aging.203279)
Supplement: Supplementary Table 3 [file aging-13-203279-s004.xlsx]

## Sheet: Sheet1
Supplementary Table 3. PD-1 expression in 95 PBMCs.
Samples	NK Ratio （CD16+56+）	NKT Ratio （CD3+16+56+）	CD3 Ratio	CD4 Ratio	CD8 Ratio	CD4+PD-1+ /CD4+	CD8+PD-1+ /CD8+	CD3+PD-1+ /PBMC	Cytotoxicity（E/T=20:1,2h)	Cytotoxicity（E/T=10:1,2h)	Cytotoxicity（E/T=20:1,4h)	Cytotoxicity（E/T=10:1,4h)
Donor-PBMC-1	49.25	1.73	20.29	10.23	10.76	5.68	5.23	1.02				10
Donor-PBMC-2	69.75	1.27	16.77	15.52	3.79	3.3	11.36	0.84				27
Donor-PBMC-3	28.92	2.14	43.74	33.14	7.6	1.86	8.2	1.15	11	9	26	19
Donor-PBMC-4	7.67	4.31	24.84	12.11	11.26	4.12	2.26	0.68
Donor-PBMC-5	23.23	12.99	48.02	18.04	19.87	10.62	4.35	2.64
Donor-PBMC-6	37.85	6.38	47.01	28.31	14.85	6.53	10.15	3.03
Donor-PBMC-7	25.63	12.1	53.07	23.11	24.09	6.41	4.65	2.02
Donor-PBMC-8	33.52	2.9	31.63	20.38	13.51	7.29	7.24	2.27				38
Donor-PBMC-9	13.94	8.68	67.73	40.47	22.59	10.94	14.99	7.34
Donor-PBMC-10	27.31	2.01	52.83	27.24	24.48	4.76	6.43	2.67				19
Donor-PBMC-11	33.48	2.09	34.5	20.4	9.28	5.73	7.57	1.72
Donor-PBMC-12	12.94	8.06	72.25	36.94	30.88	5.34	9.78	4.21				18
Donor-PBMC-13	17.22	3.88	42.19	20.86	22.36	2.3	1.69	0.83				17
Donor-PBMC-14	12.64	19.53	58.74	31.23	30.62	3.62	2.34	1.46				17
Donor-PBMC-15	13.94	25.57	70.12	24.32	19.62	2.94	5.41	1.47				15
Donor-PBMC-16	42.82	4.2	42.22	23.74	18.5	5.88	16.48	3.94				20
Donor-PBMC-17	22.91	5.18	53.46	29.97	21.6	3.27	4.33	1.77				18
Donor-PBMC-18	12.53	5.34	63.07	45.54	14.78	2.31	5.37	1.38				15
Donor-PBMC-19	10.16	2.22	51.22	40.73	13.57	0.66	0.88	0.35				16
Donor-PBMC-20	27.83	1.61	24.04	22.69	7.65	5.65	20.03	2.69				41
Donor-PBMC-21	29.52	2.84	53.14	40.13	11.46	2.55	16.28	2.62				17
Donor-PBMC-22	21.8	5.17	50.69	33.58	14.15	2.06	5.81	1.31				14
Donor-PBMC-23	28.85	5.45	55.45	39.72	14.35	3.35	11.7	2.78				9
Donor-PBMC-24	22.44	16.68	58.25	31.62	19.65	9.16	14.68	4.67
Donor-PBMC-25	20.95	8.16	59.81	35.17	31.32	6.54	16.87	6.76
Donor-PBMC-26	29.06	9.6	58.41	37.09	22.09	4.78	10.69	3.41				16
Donor-PBMC-27	28.31	5.5	55.33	33.87	22.37	3.6	9.87	2.79
Donor-PBMC-28	45.32	11.44	33.06	14.77	13.2	7.68	6.05	1.89				18
Donor-PBMC-29	26.64	11.38	58.67	24.88	33.15	3.96	3.48	1.79				17
Donor-PBMC-30	15.52	6.06	57.38	26.96	28.8	1.97	1.96	0.72
Donor-PBMC-31	36.19	4.54	49.38	22.67	27.54	4	3.31	1.31
Donor-PBMC-32	29.82	5.59	40.01	13.29	22.65	10.61	12.17	3.88
Donor-PBMC-33	23.44	3.61	53.49	28.14	18.14	8.79	9.04	3.77
Donor-PBMC-34	17.77	4.61	30.57	13.59	15.88	6.43	17.29	3.08
Donor-PBMC-35	9.99	2.18	27.6	18	12.3	10.12	12.59	2.88
Donor-PBMC-36	22.37	15.53	64.86	32.6	24.49	15.56	19.49	12.8
Donor-PBMC-37	37.9	8.54	40.73	19.1	21.48	3.53	5.75	1.64
Donor-PBMC-38	25.41	4.55	41.02	21.94	8.34	6.16	10.93	2.22
Donor-PBMC-39	24.71	2.48	46.61	27.17	19.41	3.36	4.36	1.73
Donor-PBMC-40	28.41	0.81	29.6	28.51	6.38	5.32	17.78	2.58
Donor-PBMC-41	18.47	5.11	58.96	30.75	23.88	2.57	2.29	1.22
Donor-PBMC-42	23.53	4.06	60.57	36.89	24.02	5.6	7.84	3.36
Donor-PBMC-43	36.29	3.35	31.81	21.44	8.79	8.62	20.92	3.34
Donor-PBMC-44	34.76	13.24	33.97	17.37	10.89	4.34	3.67	1.45
Donor-PBMC-45	12.85	3.66	59.62	32.08	32.17	7.21	6.05	3.5
Donor-PBMC-46	28.93	5	32.96	20.32	11.89	11.64	27.46	5.21
Donor-PBMC-47	26.31	5.66	58.96	18.66	28.01	7.74	6.41	3.02
Donor-PBMC-48	32.91	7.23	50.34	24.01	23.23	9.15	6.03	3.07
Donor-PBMC-49	44.16	7.17	33.04	22.46	8.57	4.14	7.04	1.08
Donor-PBMC-50	28	1.69	52.66	28.07	20.81	1.99	3.83	1.29
Donor-PBMC-51	38.58	4.18	51.85	26.07	11.26	8.83	24.82	4.25
Donor-PBMC-52	13.92	2.21	55.4	31.56	24.17	5.65	15.83	4.93
Donor-PBMC-53	27.48	2.99	50.61	22.79	25.27	5.52	16.48	5.15	12	7	26	13
Donor-PBMC-54	11.49	3.16	79.92	53.86	10.88	4.46	22.04	4.46
Donor-PBMC-55	29.6	4.63	53.32	30.26	23.59	5.31	5.16	2.45
Donor-PBMC-56	14.01	7.15	65.44	35.5	23.86	3.14	4.98	2.03
Donor-PBMC-57	34.08	5.66	47.44	23.56	18.4	4.34	7.03	2.14
Donor-PBMC-58	25.85	4.48	36.27	25.51	14.31	7.77	20.8	4.36
Donor-PBMC-59	5.45	4.79	40.74	18.28	14.7	4.34	3.67	1.45
Donor-PBMC-60	16.56	12.68	68.53	31.99	24.64	3.16	4.36	2.04
Donor-PBMC-61	39.88	5.17	41.87	22.96	12.03	5.87	11.59	2.41
Donor-PBMC-62	28.19	5.21	47.82	26.38	14.56	3.85	7.32	1.92
Donor-PBMC-63	27.57	5.8	44.14	24.45	13.42	4.39	7.89	2.03	5	5	10	10
Donor-PBMC-64	20.9	4.97	55.88	40.95	11.61	4.01	6.74	2.37
Donor-PBMC-65	42.91	5.64	24.04	10.53	9.96	18	11.63	2.75
Donor-PBMC-66	27.45	5.06	51.27	30.73	25.1	8.93	3.78	3.2
Donor-PBMC-67	17.24	4.44	65.23	29.63	35.38	10.93	15.43	7.51	14	11	19	18
Donor-PBMC-68	36.48	3.41	42.16	29.34	12.95	3.27	4.33	1.77	11	6	15	10
Donor-PBMC-69	34.52	4.66	41.71	17.26	17.72	4.94	8.7	2.18	4	4	13	9
Donor-PBMC-70	17.66	1.44	47.79	32.78	16.95	5.35	6.9	2.57
Donor-PBMC-71	21.76	3.83	62.16	38.44	19.65	3.41	14.58	3.96
Donor-PBMC-72	18.69	3.99	36.62	23.67	13.94	5.24	14.18	2.83
Donor-PBMC-73	29.86	5.73	47.05	25.65	18.74	6.43	6.33	2.58
Donor-PBMC-74	39.63	7.37	47.47	28.36	16.46	2.05	4.04	1.21
Donor-PBMC-75	16.22	5.98	68.5	41.23	20.8	4.91	19.36	5.37
Donor-PBMC-76	24.35	3.53	52.86	28.78	22.43	5.48	7.93	2.83
Donor-PBMC-77	20.14	4.47	53.81	28.45	23.84	6.6	8.7	3.17
Donor-PBMC-78	29.32	3.87	48.94	24.72	23.17	7.08	8.65	2.95
Donor-PBMC-79	20.58	4.13	57.71	42.72	12.32	2.37	7.78	1.65
Donor-PBMC-80	26.17	3.24	53.23	42.14	12.3	3.09	9.08	1.98
Donor-PBMC-81	13.19	7.1	72.56	41.85	24.89	3.32	5.82	2.65
Donor-PBMC-82	12.6	5.8	65.56	39.92	25.56	5.5	10.01	3.64
Donor-PBMC-83	10.64	6.58	75.87	42.12	22.94	4.63	8.17	3.17
Donor-PBMC-84	23.58	7.85	55.16	29.76	27.67	4.21	5.59	2.39
Donor-PBMC-85	33.18	6.77	53.38	30.71	23.6	4.08	4.45	1.99
Donor-PBMC-86	11.77	3.85	67.73	62.41	7.35	2.21	10.08	1.69
Donor-PBMC-87	17.14	8.34	62.89	41.48	21.82	6.92	10.53	4.03
Donor-PBMC-88	16.86	2.5	55.8	39.18	26.21	8.48	20.2	6.57
Donor-PBMC-89	37.94	9.71	39.73	18.15	22	6.94	5.08	2.05
Donor-PBMC-90	29.78	3.88	50.78	28.61	18.4	5.95	8.52	2.9
Donor-PBMC-91	26.59	2.85	36.67	26.44	11.05	2.31	6.8	1.3
Donor-PBMC-92	32.63	6.68	50.99	26.04	15.93	5.95	10.38	2.99	6	6	8	7
Donor-PBMC-93	16.2	7.02	63.67	38.76	17.64	9.98	10.86	5.41	7	5	12	7
Donor-PBMC-94	24.71	3.63	48.66	26.07	18.86	5	12.91	3.4	12	9	16	10
Donor-PBMC-95	77.87	1.12	7.26	2.23	4.11	14.35	6.97	0.59
